# Supplementary material
Source: bioRxiv or medRxiv preprint supplement (https://www.biorxiv.org/highwire/filestream/85890/field_highwire_adjunct_files/0/279539-1.pdf)
Supplement: Supplementary file [file 279539-1.pdf]

# KCC2 overexpression prevents the paradoxical seizure-promoting action of somatic inhibition

## SUPPLEMENTARY FIGURES / MOVIE

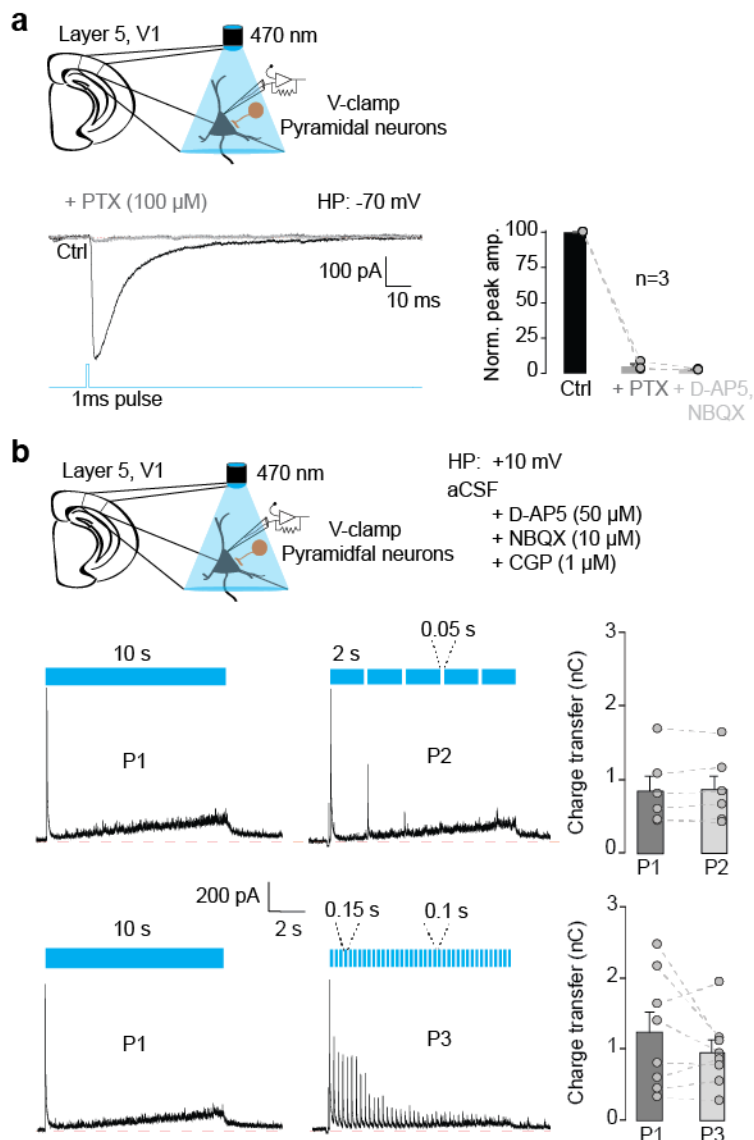

### Supplementary Figure 1. Optogenetic activation of ChR2-expressing PV+ interneurons in the visual cortex V1 area.

(a) Blue light pulse-induced current responses in pyramidal layer 5 V1 neurons are abolished by the GABA<sub>A</sub> receptor antagonist picrotoxin (PTX; n = 3 cells).

(b) GABA<sub>A</sub> receptor-mediated currents in pyramidal neurons induced by 3 different optogenetic stimulation protocols (P1: continuous 10 s stimulation; P2: five 2-s-long pulses delivered with 50 ms intervals; P3: 10 s stimulation with 150 ms-long pulses separated by 100 ms intervals). Continuous photostimulation produces GABA<sub>A</sub> receptor-mediated charge transfer similar to that elicited by intermittent light pulses (P1 vs. P2: n = 5 cells; P1 vs P3: 8 cells; p > 0.05, paired t-test).

HP: holding potential.

## KCC2 overexpression prevents the paradoxical seizure-promoting action of somatic inhibition

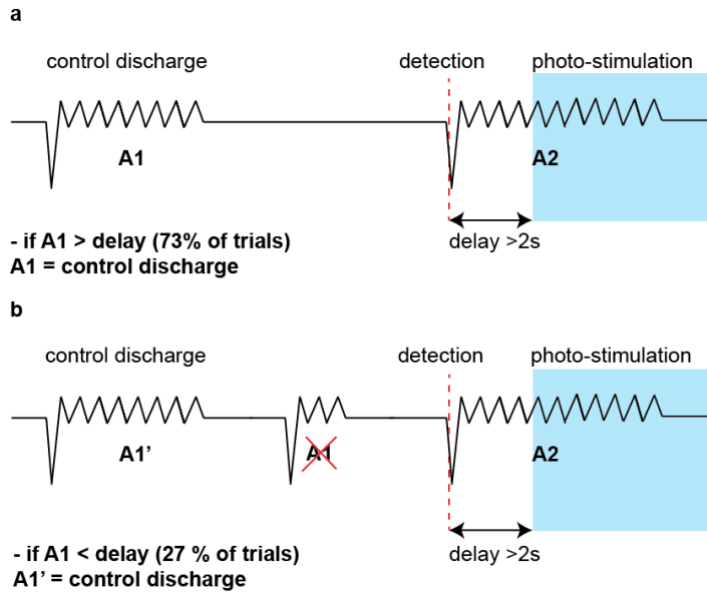

### Supplementary Figure 2. Analysis of delayed photostimulation.

(a) In the majority of trials (73%), the duration of the photostimulated seizure was compared to that of the immediately preceding non-stimulated (control) discharge, if it was longer than the photostimulation delay.

(b) In 27 % of the trials, the control discharge was shorter than the photostimulation delay. In these cases, the nearest (within 30 s) preceding seizure of sufficient length was used for comparison.

## KCC2 overexpression prevents the paradoxical seizure-promoting action of somatic inhibition

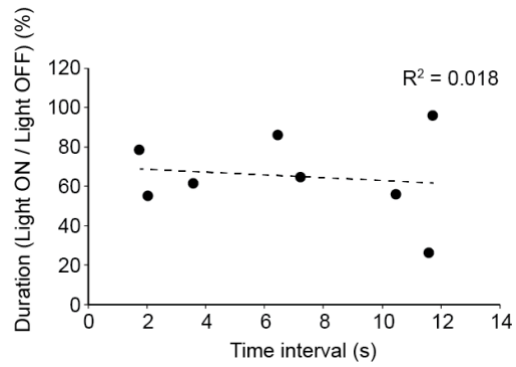

**Supplementary Figure 3. Seizure suppression by photo-depolarization of ChR2-expressing PV+ interneurons is independent of the time interval between seizures.**

Data points represent individual animals.

## KCC2 overexpression prevents the paradoxical seizure-promoting action of somatic inhibition

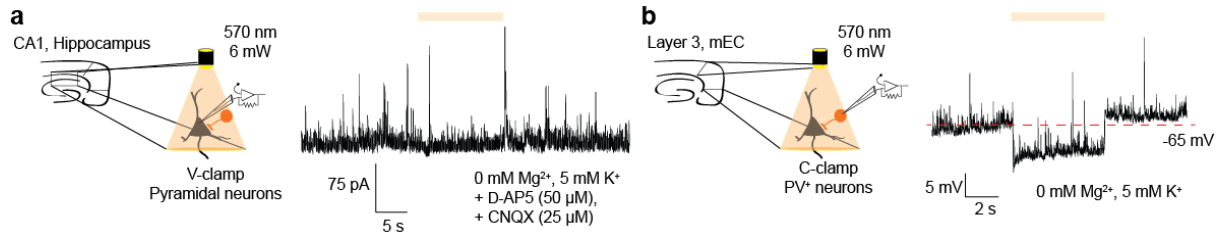

### Supplementary Figure 4. Optogenetic hyperpolarization of PV<sup>+</sup> interneurons expressing Arch3.0.

(a) Continuous yellow illumination of a slice with Arch3.0-expressing PV<sup>+</sup> cells reduces the frequency of spontaneous GABA<sub>A</sub> receptor-mediated postsynaptic currents recorded in a pyramidal neuron.

(b) Whole-cell current-clamp recording demonstrating photostimulation-induced hyperpolarization of a PV<sup>+</sup> interneuron expressing Arch3.0.

## KCC2 overexpression prevents the paradoxical seizure-promoting action of somatic inhibition

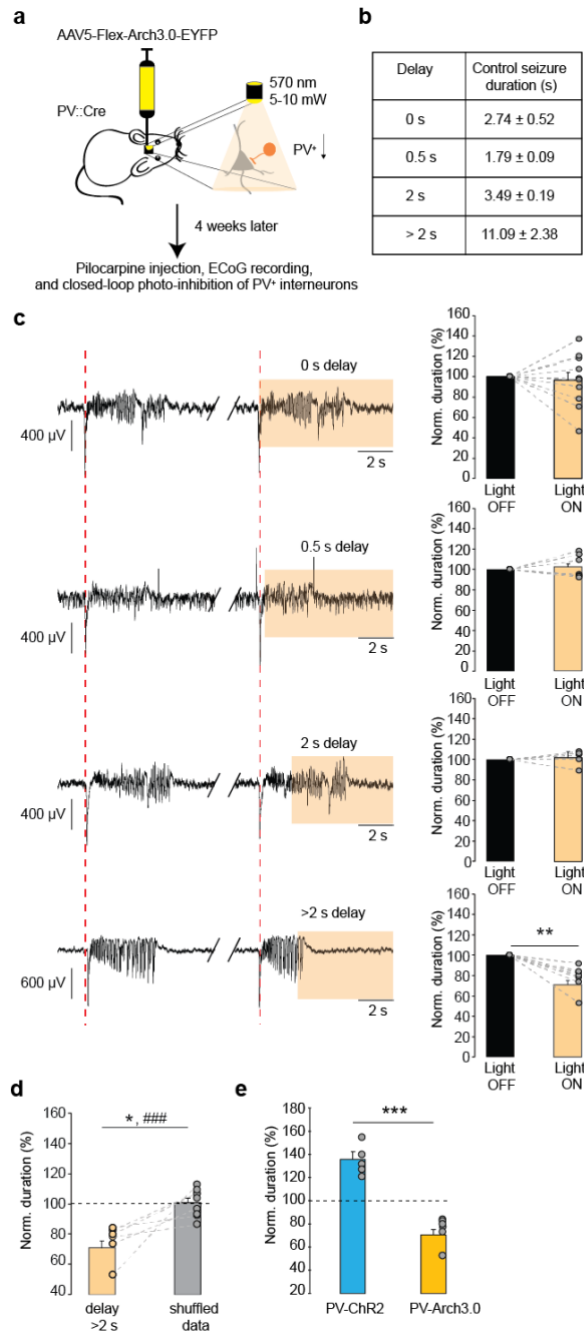

### Supplementary Figure 5. Photo-hyperpolarization of Arch3.0-expressing PV+ interneurons reduces the duration of electrographic seizures

(a) *In vivo* experimental schematic.

(b) Mean durations of control ictal discharges in experiments with different delays.

(c) Closed-loop photo-hyperpolarization of PV+ neurons reduces the duration of ictal discharges when delayed by more than 2 s (n = 11, 7, 5 and 6 mice for 0, 0.5, 2 and >2 s delays respectively). Sample traces illustrate pairs of consecutive seizures without and with photostimulation (intervening periods between seizures are omitted; yellow rectangles indicate photostimulation).

(d) The effect of delayed photoinhibition of PV+ interneurons compared to randomized reshuffled data analysis (\* p < 0.05 paired t-test, n = 6; ### p < 0.001, unpaired t-test, n = 9, includes data from additional mice injected with the Arch3.0 construct).

## **KCC2 overexpression prevents the paradoxical seizure-promoting action of somatic inhibition**

(e) Summary graph comparing the effects of delayed photo-depolarization (PV-ChR2, *blue*,  $n = 5$ ) and photo-hyperpolarization (PV-Arch3.0, *yellow*,  $n = 7$ ) of PV+ interneurons, unpaired t-test.

\*  $p < 0.05$ , \*\*  $p < 0.01$ , \*\*\*  $p < 0.001$ ; error bars represent s.e.m.

## KCC2 overexpression prevents the paradoxical seizure-promoting action of somatic inhibition

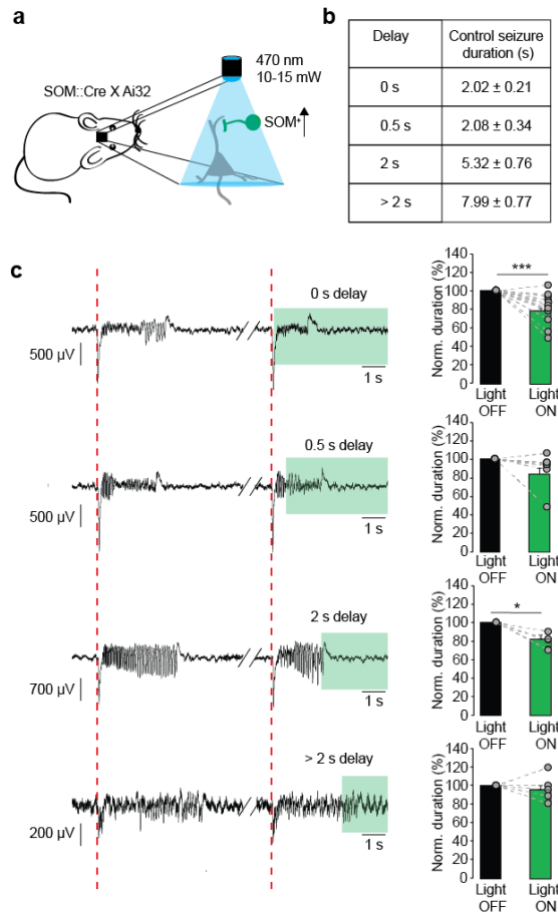

**Supplementary Figure 6. Closed-loop photostimulation of ChR2-expressing SOM<sup>+</sup> interneurons has no seizure-promoting action.**

(a) *In vivo* experimental schematic.

(b) Mean durations of control ictal discharges in experiments with different delays.

(c) Closed-loop photostimulation of SOM<sup>+</sup> interneurons with 0 s (n = 13), 0.5 s (n = 8), 2 s (n = 5), >2 s (n = 6) delays. Sample traces illustrate pairs of consecutive seizures without and with photostimulation (intervening periods between seizures are omitted; green rectangles indicate photostimulation).

\*  $p < 0.05$ , \*\*  $p < 0.01$ , \*\*\*  $p < 0.001$ ; error bars represent s.e.m.

**KCC2 overexpression prevents the paradoxical seizure-promoting action of somatic inhibition**

**Supplementary Movie 1. Simultaneous ECoG and video during local pilocarpine-induced seizure.**
